# Supplementary material
Source: Springer Nature journal article supplement (https://www.springermedizin.de/resource/supplementary/12885_2012_3520_MOESM1_ESM.pdf/9463670)
Supplement: MOESM1 [file 9463670]

KRIS, 1972–1974  
MIHDPS, 1978–1980  
n = 8,380

Linkage procedures with  
National Cancer Registry and  
Lithuanian Residents' Register Service

Duplicates,  
n=469

Status unknown,  
n=389

Death before start  
of follow-up, n=230

Cancer before start  
of follow-up, n=79

Incomplete alcohol  
consumption  
information, n=63

7,150 subjects  
for final analysis
